# Supplementary material
Source: PubMed Central journal article supplement (PMC3370069)

Figure S1

**A**

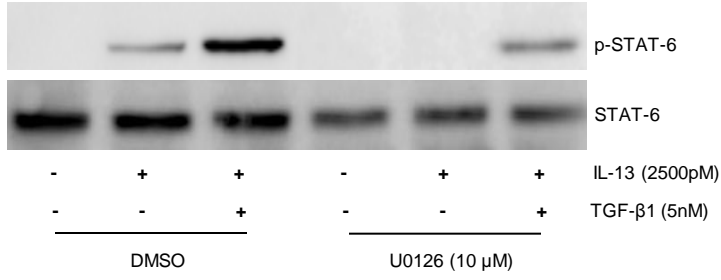

**B**

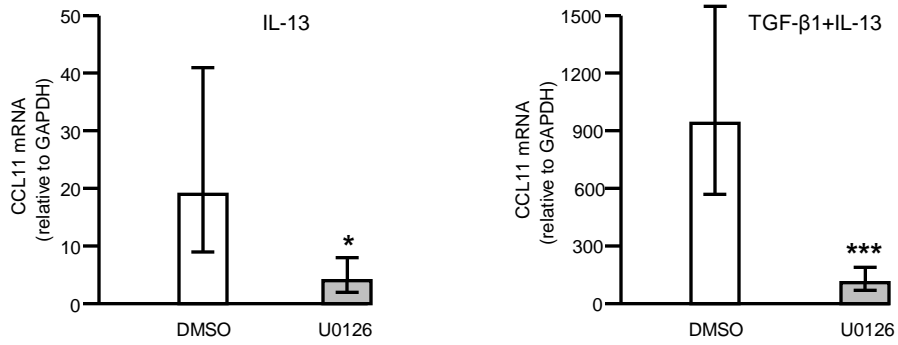

**C**

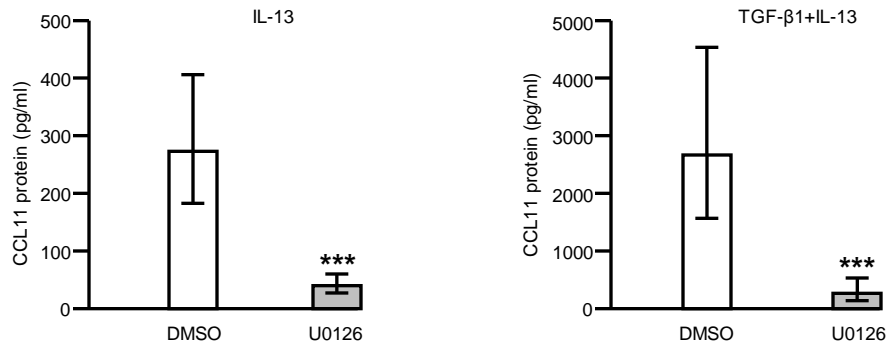

Supplement: NIHMS371076-supplement-2.pdf [file NIHMS371076-supplement-2.pdf]
